# Supplementary material for: Lnc-uc.147 Is Associated with Disease Stage of Liver, Gastric, and Renal Cancer
Source: MDPI journal article supplement (doi:10.3390/biom13020265), 2023-01-31
Supplement: s1 [file s1]

## Supplementary Material

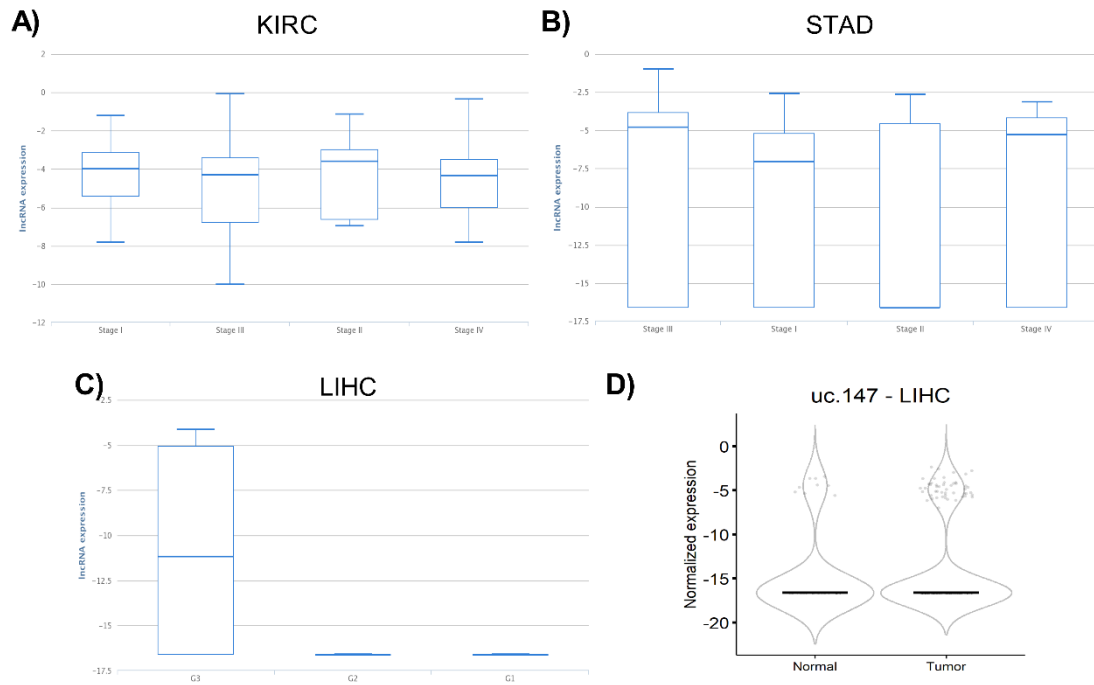

**Figure S1** – Associations of lnc-uc.147 expression with kidney renal cell carcinoma (KIRC – A), stomach adenocarcinoma (STAD – B), and hepatocellular carcinoma (LIHC – C). Graphs were generated by the TANRIC platform (<https://www.tanric.org/>), and the *p*-values associated with this analysis are presented in Table 1. D) Boxplot demonstrating the expression pattern of lnc-uc.147 in non-tumoral and tumoral samples for LIHC. Through Mann-Whitney analysis, no difference between the two groups is observed.
